# Supplementary material for: Retrieval of gridded aerosol direct radiative forcing based on multiplatform datasets
Source: Copernicus journal article supplement (doi:10.5194/amt-13-575-2020), 2020-02-07
Supplement: Supplementary file 1 [file amt-13-575-2020-supplement.pdf]

Supplement of Atmos. Meas. Tech., 13, 575–592, 2020  
<https://doi.org/10.5194/amt-13-575-2020-supplement>  
© Author(s) 2020. This work is distributed under  
the Creative Commons Attribution 4.0 License.

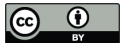

*Supplement of*

## **Retrieval of gridded aerosol direct radiative forcing based on multiplatform datasets**

**Yanyu Wang et al.**

*Correspondence to:* Qianshan He (oxeye75@163.com) and Tiantao Cheng (ttcheng@fudan.edu.cn)

The copyright of individual parts of the supplement might differ from the CC BY 4.0 License.

20 This Supplementary Information (SI) includes 4 figures.

**Supplementary Figures:**

**Figure S1.** Sketch map of aerosol vertical profile.

**Figure S2.** MODIS Terra true color map composed by 1, 4, and 3 channels on October 18, 2014 (<https://worldview.earthdata.nasa.gov/>).

25 **Figure S3.** The response of downward radiative fluxes at the surface ( $F_{d\_sur}$ ), upward radiative fluxes at the surface ( $F_{u\_sur}$ ), aerosol direct radiative forcing (ADRF) to different parameters (AOD, SSA, ASY, albedo, columnar water vapor and ozone) in the sensitivity test.

**Figure S4.** The occurrence frequency of annual ADRF for each grid cell in the North and South of East China during 2000-2016.

30

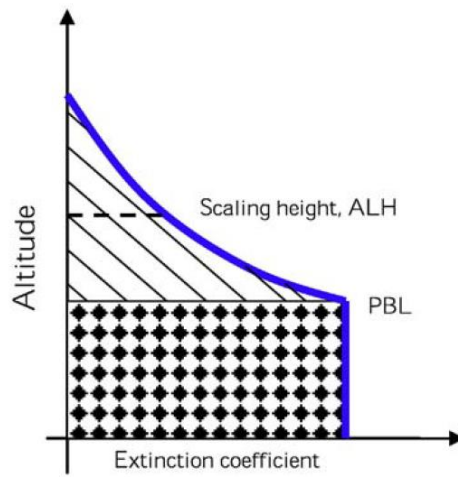

35 **Figure S1. Sketch map of aerosol vertical profile (He et al., 2008). Two-layer aerosol model is characterized by aerosol well-mixed in the PBL and exponential decay of the aerosol extinction coefficient with altitude above the top of PBL.**

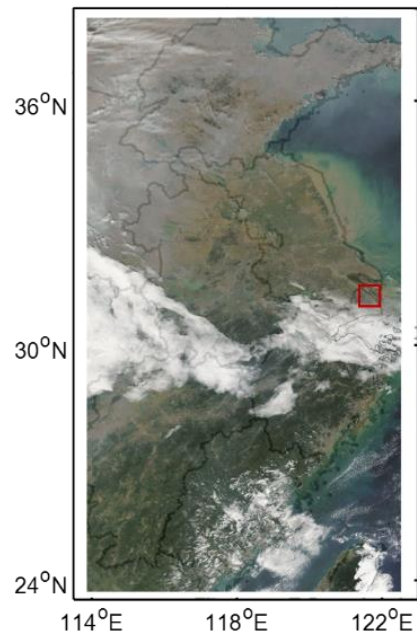

40 **Figure S2. MODIS Terra true color map composed by 1, 4, and 3 channels on October 18, 2014** (<https://worldview.earthdata.nasa.gov/>). The red rectangle box (40\*40km) is the MODIS AOD average window in Baoshan pyranometers site.

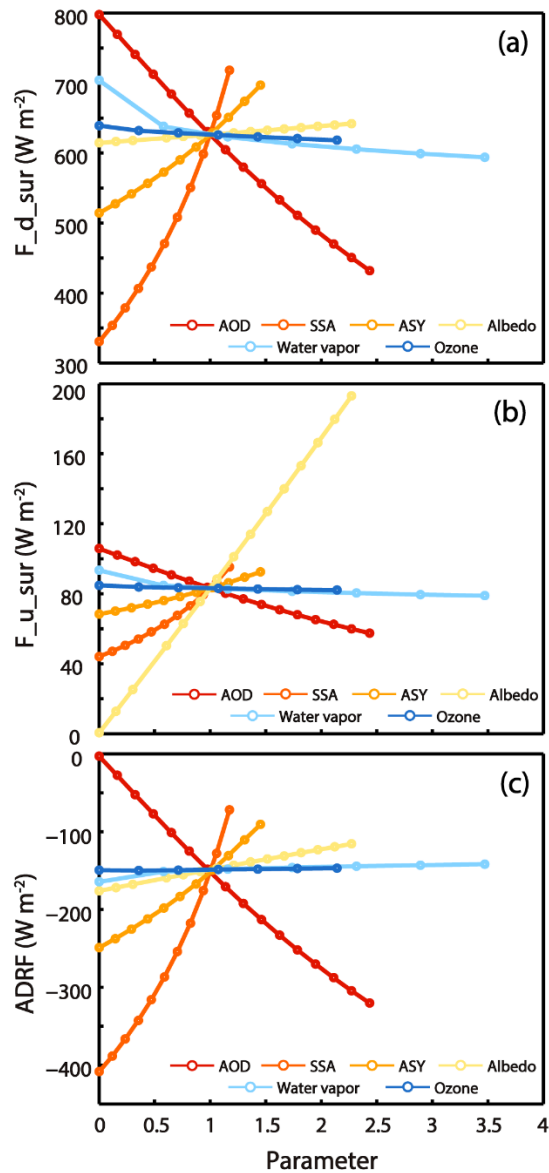

45 **Figure S3.** The response of downward radiative fluxes at the surface ( $F_{d\_sur}$ ), upward radiative fluxes at the surface ( $F_{u\_sur}$ ), aerosol direct radiative forcing (ADRF) to different parameters (AOD, SSA, ASY, albedo, columnar water vapor and ozone) in the sensitivity test. The X-axis value shows the ratio of the input to the actual value to dimensionalize the parameters for comparison.

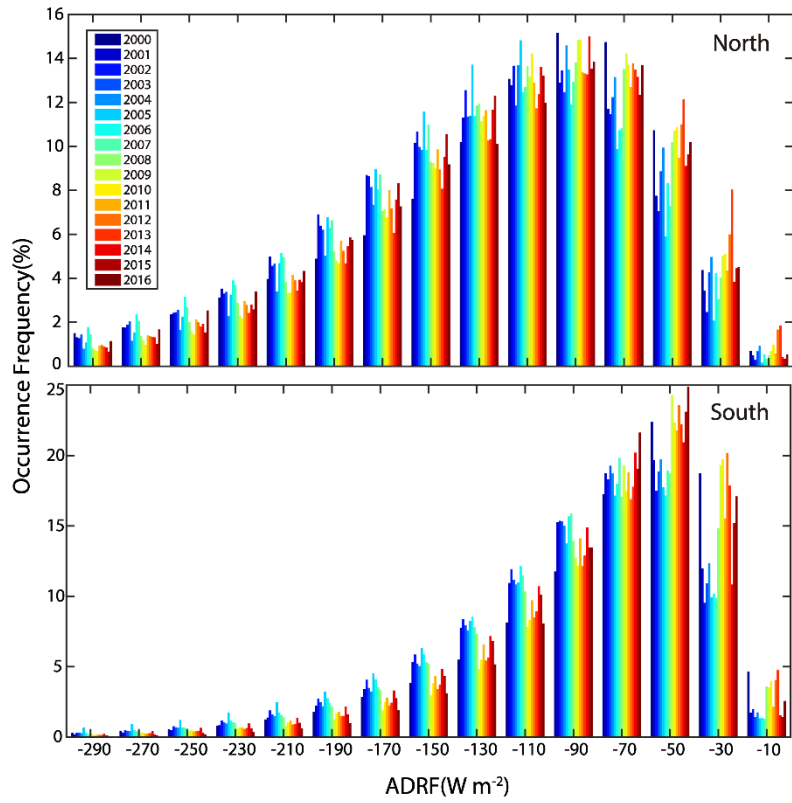

50 **Figure S4.** The occurrence frequency of annual ADRF for each grid cell in the North and South of East China during 2000-2016.
